# Supplementary material for: Continuous measurements of isotopic composition of water vapour on the EastAntarctic Plateau
Source: Copernicus journal article supplement (doi:10.5194/acp-16-8521-2016), 2016-07-13
Supplement: Supplementary file 1 [file acp-16-8521-2016-supplement.zip]

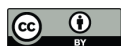

*Supplement of*

## **Continuous measurements of isotopic composition of water vapour on the East Antarctic Plateau**

**Mathieu Casado et al.**

*Correspondence to:* Mathieu Casado ([mathieu.casado@gmail.com](mailto:mathieu.casado@gmail.com))

- [acp-16-8521-2016-supplement-title-page.pdf](#)
- [Dataset\\_ACP2016-8.xlsx](#)
- [Vapour monitoring dome C\\_supplementary.pdf](#)

The copyright of individual parts of the supplement might differ from the CC-BY 3.0 licence.
